# Supplementary material for: Detection and Genetic Characterization of Hepatitis B and D Viruses: A Multi-Site Cross-Sectional Study of People Who Use Illicit Drugs in the Amazon Region
Source: MDPI journal article supplement (doi:10.3390/v13071380), 2021-07-15
Supplement: s1 [file s1]

## SUPPLEMENTARY MATERIALS

Title: Detection and genetic characterization of hepatitis B and D viruses: a multi-site cross-sectional study of people who use illicit drugs in the Amazon region.

Authors: Ronylson José S. Silva, Raquel Silva do Nascimento, José Augusto J. Oliveira Neto, Fabricio Quaresma Silva, Juliana Nádia F. Piauiense, Camila Moraes Gomes, Luiz Marcelo L. Pinheiro, Rafael Lima Resque, João Renato R. Pinho, Emil Kupek, Benedikt Fischer, Luiz Fernando A. Machado, Luísa Caricio Martins, José Alexandre R. Lemos, Aldemir B. Oliveira-Filho.

**Table S1.** Information used for the construction of the phylogenetic trees of the hepatitis B virus (HBV) in this study.

| Akaike information criterion (AIC)* | Bayesian Information Criterion (BIC)* |
|-------------------------------------|---------------------------------------|
| Model = TVM+I+G                     | Model = TPM3uf+G                      |
| Partition = 012314                  | Partition = 012012                    |
| -lnL = 14408.9885                   | -lnL = 4519.5605                      |
| K = 331                             | K = 86                                |
| FreqA = 0.2444                      | FreqA = 0.1630                        |
| FreqC = 0.2652                      | FreqC = 0.3115                        |
| FreqG = 0.2012                      | FreqG = 0.2650                        |
| FreqT = 0.2893                      | FreqT = 0.2605                        |
| R(a) [AC] = 2.3370                  | R(a) [AC] = 0.5556                    |
| R(b) [AG] = 4.3672                  | R(b) [AG] = 2.8769                    |
| R(c) [AT] = 1.2537                  | R(c) [AT] = 1.0000                    |
| R(d) [CG] = 0.4893                  | R(d) [CG] = 0.5556                    |
| R(e) [CT] = 4.3672                  | R(e) [CT] = 2.8769                    |
| R(f) [GT] = 1.0000                  | R(f) [GT] = 1.0000                    |
| p-inv = 0.3610                      |                                       |
| Gamma shape = 0.5020                | Gamma shape = 0.5330                  |

\*Information provided by the jModeltest2 software from the analysis of the alignment of the nucleotide sequences in this study and the reference sequences deposited at the NCBI.

Note: To test the robustness of the maximum likelihood tree topologies, 1,000 bootstrap replicates were performed. Bayesian analyzes consisted of two independent runs (Chain lengths of  $2 \times 10^6$  Markov Chain Monte Carlo) with a total of 1,000 interactions and 10% burn-in.

**Table S2.** Information used for the construction of the phylogenetic trees of the hepatitis D virus (HDV) in this study.

| <b>Akaike information criterion (AIC)*</b> | <b>Bayesian Information Criterion (BIC)*</b> |
|--------------------------------------------|----------------------------------------------|
| Model = TIM3+G                             | Model = TPM3uf+I+G                           |
| Partition = 012032                         | Partition = 012012                           |
| -lnL = 4518.5076                           | -lnL = 3809.7180                             |
| K = 87                                     | K = 79                                       |
| FreqA = 0.1709                             | FreqA = 0.1571                               |
| FreqC = 0.3017                             | FreqC = 0.3116                               |
| FreqG = 0.2741                             | FreqG = 0.2871                               |
| FreqT = 0.2533                             | FreqT = 0.2442                               |
| R(a) [AC] = 0.5553                         | R(a) [AC] = 0.5935                           |
| R(b) [AG] = 2.5338                         | R(b) [AG] = 2.8917                           |
| R(c) [AT] = 1.0000                         | R(c) [AT] = 1.0000                           |
| R(d) [CG] = 0.5553                         | R(d) [CG] = 0.5935                           |
| R(e) [CT] = 3.2090                         | R(e) [CT] = 2.8917                           |
| R(f) [GT] = 1.0000                         | R(f) [GT] = 1.0000                           |
|                                            | P-inv = 0.3290                               |
| Gamma shape = 0.5340                       | Gamma shape = 1.7530                         |

\*Information provided by the jModeltest2 software from the analysis of the alignment of the nucleotide sequences in this study and the reference sequences deposited at the NCBI.

Note: To test the robustness of the maximum likelihood tree topologies, 1,000 bootstrap replicates were performed. Bayesian analyzes consisted of two independent runs (Chain lengths of  $2 \times 10^6$  Markov Chain Monte Carlo) with a total of 1,000 interactions and 10% burn-in.
