# Supplementary figures and images for: Detection and Genetic Characterization of Hepatitis B and D Viruses: A Multi-Site Cross-Sectional Study of People Who Use Illicit Drugs in the Amazon Region
Source: MDPI journal article supplement (doi:10.3390/v13071380), 2021-07-15

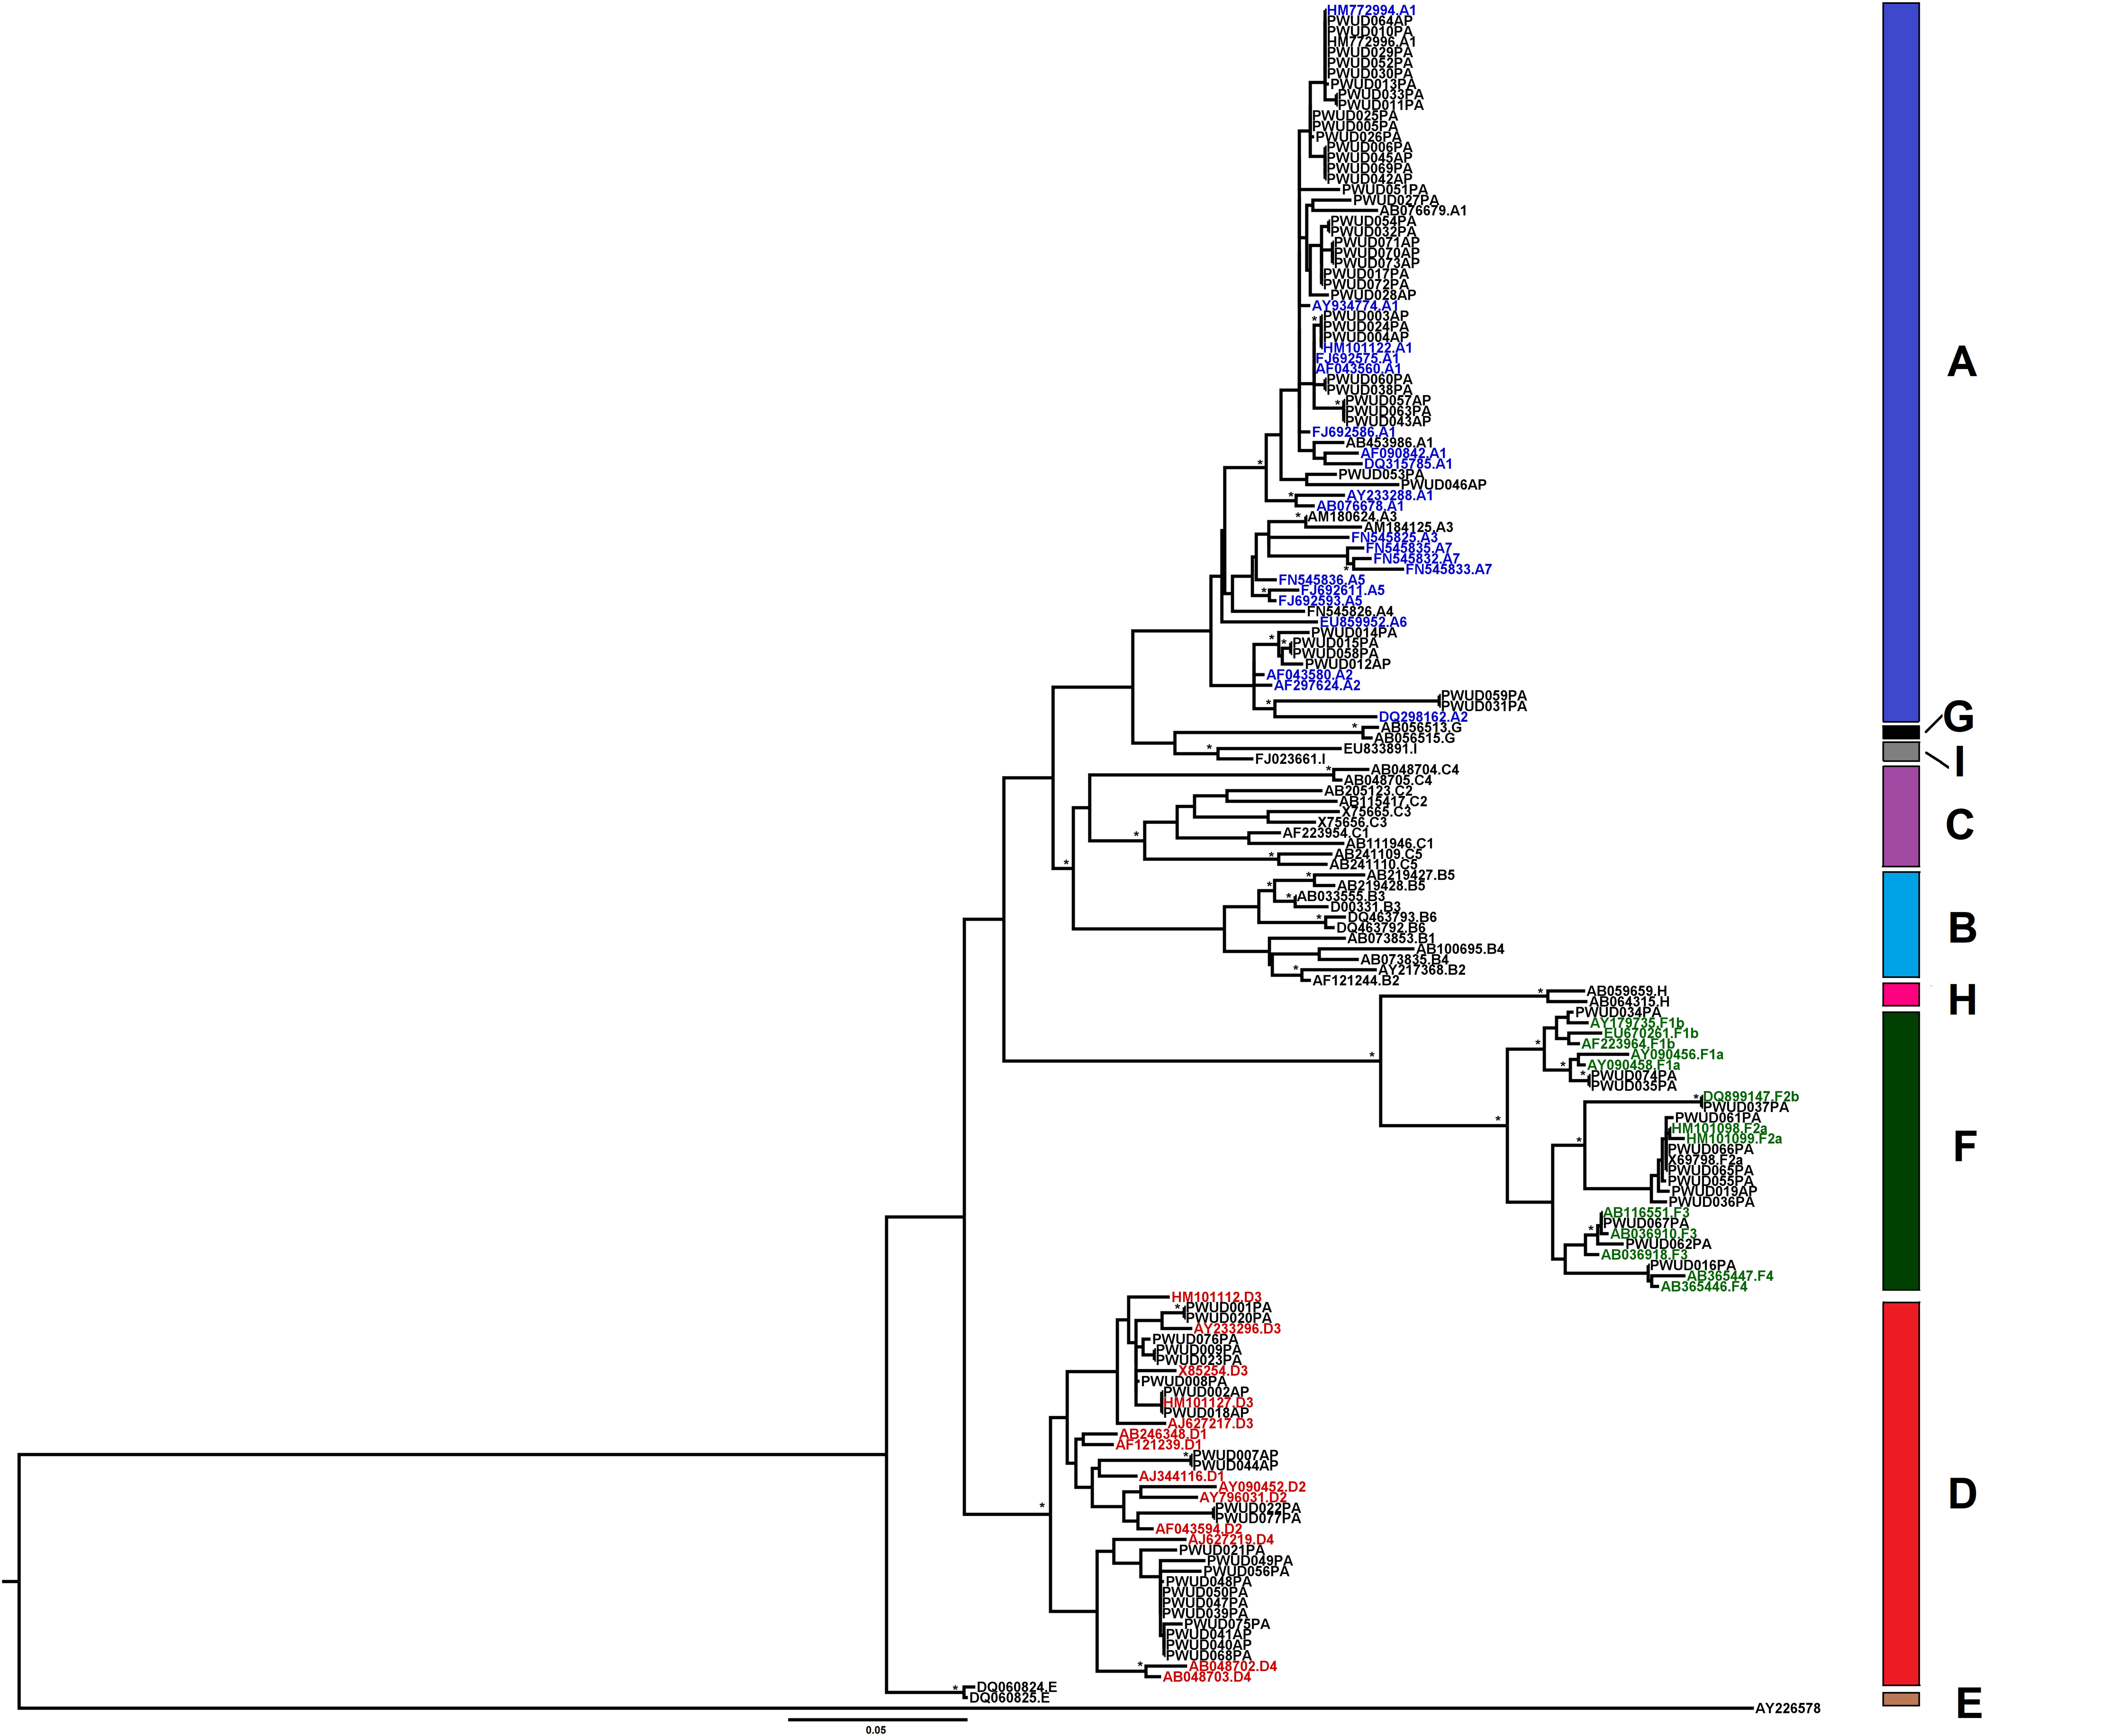

Supplement: s1 [file s1]
